# Supplementary material
Source: publisher site journal article supplement (https://www.dovepress.com/article/547872)
Supplement: Supplementary file 1 [file 547872%20Supplementary%20material.docx]

# **APPENDIX 1**

# **Ethical submission form**


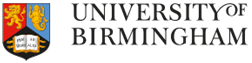


**Ethical review form**

For further guidance, please refer to the relevant University’s Code of Ethics or the BERA guidelines: <https://www.bera.ac.uk/researchers-resources/resources-for-researchers>

As you are undertaking this research as a member of the university, you need to adhere to the code of practice for research: <https://www.birmingham.ac.uk/Documents/university/legal/research.pdf>

Please include this completed form, participant information sheet, consent form and data gathering tool(s) as appendices to your assignment.

If, during the course of your study, your methods, methodology and /or participant group(s) alter substantially from those outlined in this submission, continued ethical approval must not be assumed. Please consult your supervisor if this occurs, as you may need to submit an amendment.

Notes for completion [See relevant section of the form]

If working with children or vulnerable adults, you will need to have an up to date Disclosing and Barring Service (DBS) check (previously known as CRB). If this applies to your project, please discuss with your supervisor. Further information can be found at: <https://www.gov.uk/government/organisations/disclosure-and-barring-service/about>

This may apply in circumstances where methods involve the use of e.g. video or photographs that could identify participants; in the case of interviews where the status / job role of the interviewee will enable them to be identified by others; or in some cases, where participants may be identified from combinations of data.

This concern may arise, for example, in experimental or quasi-experimental designs where treatment is viewed as desirable and withheld from the control group. It might also arise in unpredictable ways in other intervention designs and, for example, in interview-based studies. Harm to the researcher if, for example, working with emotionally difficult subject matter or in potentially dangerous contexts should also be considered here including the forms of support that will be made available in such circumstances.

You may wish to refer to the BERA Revised Ethical Guidelines for Educational Research, 2018; paragraphs 42 & 47, p.22-23 for more information about this issue.

When applying for a DBS make it clear whether the check is for children or vulnerable adults or both. Also, organisations/schools/ services may have different requirements for how recently a DBS check should have been completed for it to be acceptable. You are advised to check the DBS web site for further information <https://www.gov.uk/government/organisations/disclosure-and-barring-service/about>

**PROPOSED PROJECT TITLE:** Why do students prefer using commercial-off-the-shelf learning platforms? A qualitative explorative study

**STUDENT NAME:** Richard Phillips

**PROGRAMME OF STUDY:** PG Dip Education for Healthcare Professionals

**DATE:** 09/05/2023

**NAME OF SUPERVISOR:** Jamie Coleman

**Ethics approval granted by Professor Jamie Coleman by University of Birmingham**

**BRIEF OUTLINE OF YOUR PROPOSED STUDY**

***(c.250 words; this may be attached separately)***

This will be a qualitative explorative study, seeking to identify and explain the student and teacher perceptions of their relationships with commercial education resources (MedED-COTS) to strengthen the evidence base on why students use these resources to supplement their institutionally available resources.

The BEME guide review no. 72 focusing on MedED-COTS identified several unexplored areas in the topic area, which have influenced the focus of this protocol (Hirumi *et al*, 2022). This includes a need to develop greater understanding of how and why students opt to use commercial education resources. Expanding upon this, the study will also explore the student perspectives of why they use MedED-COTS in lieu of institutional learning materials. Additionally, this protocol outlines a methodology for exploring the challenges that teaching faculty face from the growing emergence of MedED-COTS. Finally, this will culminate in a local evaluation of the success of the recent integration of MedED-COTS (Osmosis and CAPSULE) into the University of Birmingham undergraduate medical curriculum.

Qualitative data will be collected from semi-structured focus groups, which will aim to explore the perspectives and interactions of medical students, and again separately for institutional faculty. Data analysis will be conducted using thematic analysis.

**MAIN ETHICAL CONSIDERATION(S) OF YOUR STUDY**

*(e.g. data protection, confidentiality, working with vulnerable participants; photographs of participants; material that could give offence etc)*

There are no major risks or direct incentives in taking part.

The consent forms and transcripts from the focus groups will be kept strictly confidential within the Sandwell and West Birmingham Hospitals Trust (SWBH) IT systems. No intentional efforts will be made to identify individual participants in the published report, however no guarantee of absolute anonymity can be given due to the nature of a single-centre study. Nonetheless, every effort will be taken to ensure any quotations are anonymised to avoid accidental disclosure of individual identity.

Data will be minimally available only to the chief investigator (Dr Richard Phillips) and project lead (Professor Jamie Coleman), as well as authorised members of the University of Birmingham R&D team for the purpose of Sponsor oversight only.

The results of the project will be shared with the University of Birmingham, with hopes to present at a conference or publish in a scientific journal.

**INTENDED METHODS OF RECRUITMENT, DATA COLLECTION AND ANALYSIS.**

***Please outline each of these (in 100-250 words) in as much detail as you can.***

Emails sent out via SWBH administrators and/or University of Birmingham administrators/gatekeepers to teaching fellow and students in years 4 and 5 (per inclusion/exclusion criteria), inviting individuals to read a participation leaflet, sign-up to a focus group and complete a consent form. Consent forms must be completed prior to attending virtual focus groups Further snowball sampling will also be used after the teaching. The focus groups will be conducted online via Zoom, with RP as the facilitator. The facilitator will take Coursera training on focus group moderation All focus group discussions will be transcribed verbatim using Zoom software and entered into NVivo 12 for thematic analysis.

INFORMED CONSENT

*How will you make sure that all participants understand the process in which they are to be engaged and that they provide their voluntary and informed consent?*

All individuals will have access to a participation information leaflet that outlines the main aims of the study, how it will be conducted and how the data will be stored. It will also outline any perceivable risks. Individuals will then have a separate opportunity to complete an informed consent form. Consent forms must be completed and returned before participation in the focus groups.

***Does your project involve working with children or other vulnerable groups? [See note 1]***

No.

***How will you ensure that participants understand their right to withdraw from the study?***

This will be detailed in the participation information leaflet, as well as the informed consent form. I will also detail this at the beginning of each focus group.

***How will you ensure the confidentiality and anonymity of participants? Where this is not guaranteed, please justify your approach [see note 2]***

The consent forms and transcripts from the focus groups will be kept strictly confidential within the Sandwell and West Birmingham Hospitals Trust (SWBH) IT systems. No intentional efforts will be made to identify individual participants in the published report, however no guarantee of absolute anonymity can be given due to the nature of a single-centre study. Nonetheless, every effort will be taken to ensure any quotations are anonymised to avoid accidental disclosure of individual identity.

Data will be minimally available only to the chief investigator (Dr Richard Phillips) and project lead (Professor Jamie Coleman), as well as authorised members of the University of Birmingham R&D team for the purpose of Sponsor oversight only.

***Describe any possible detrimental effects of the study on either participants or researcher or participants. What are your strategies for dealing with them? [See note 3].***

The main identified harm is participant inconvenience caused by focus groups running too long. Efforts to minimalise this have been taken by setting the expected length of focus groups at 60 minutes, with a strict cut-off at 90 minutes.

***How will you ensure the safe and appropriate storage and handling of data?***

All data will be anonymised, and transferred and stored confidentially in accordance with General Data Protection Regulation (GDPR). Data will be minimally available only to the chief investigator (Dr Richard Phillips) and project lead (Professor Jamie Coleman), as well as authorised members of the University of Birmingham R&D team for the purpose of Sponsor oversight only.

***If during the course of the study you become aware of harmful or illegal behaviour, how do you intend to handle disclosure or non-disclosure of such information? [See note 4]***

Participants will be made aware that their indication of any intended continued illegal behaviour may affect confidentiality and anonymity.

***Does the study design require some degree of subterfuge or undisclosed research activity? If so, what is your justification for this? How and when will this be discussed with participants?  [If this applies, discuss with your supervisor before submitting this form].***

No.

***How do you intend to disseminate your research study findings to participants?***

*e.g. ‘Give short summary/feedback sheet’; ‘Presentation to colleagues at team meeting’.*

The results of the project will be shared with the University of Birmingham, with hopes to present at a conference or publish in a scientific journal.

I confirm that these details are an accurate description of my proposed project and its potential ethical issues.

Signed (student): RICHARD PHILLIPS (R PHILLIPS) . Date: 14/05/2023

# **APPENDIX 2**

# **Participant information leaflet**

**Participant information leaflet**

Prior to consenting to be a participant in this study it is important to understand the purpose of the research and what the participants will be involved with. Kindly read the following information and take time before considering involvement before agreeing to take part. The researcher can be contacted directly for further information, or if clarity is required.

**Purpose of the study**

We aim to explore the student and teacher perceptions of their relationships with commercial education resources to strengthen the evidence base on why students use these resources to supplement their institutionally available resources. We aim to complete the study by July 2023.

**Why have I been chosen?**

You have been chosen to take part because you are a medical student with at least 1 year of clinical experience, or a clinical teaching fellow.

**Do I have to take part?**

No. Participation is voluntary and refusing to partake or withdraw will in no way cause penalty to you now or in the future.

**What will happen to me if I take part?**

If you agree to partake then you must complete the informed consent form (paper or virtual copy). All virtual copies should be signed with an electronic signature and returned to the chief investigator, Dr Richard Phillips

After consent is collected, you will be invited to partake in a focus group by email. These focus groups will be conducted virtually for participant ease, as well as to allow the discussions to be automatically transcribed using transcription tools. No further action will be required from you once the focus group is completed. Should you wish to withdraw consent prior to, during, or after the focus group this is possible and you should contact the chief investigator.

**Are there possible benefits and/or risks in taking part?**

There are no major risks or direct incentives in taking part. However, your participation assists in the understanding of student perspectives surrounding MedED-COTS.

**Will my taking part in this project be kept confidential?**

The consent forms and transcripts from the focus groups will be kept strictly confidential within the Sandwell and West Birmingham Hospitals Trust (SWBH) IT systems. No intentional efforts will be made to identify individual participants in the published report, however no guarantee of absolute anonymity can be given due to the nature of a single-centre study. Nonetheless, every effort will be taken to ensure any quotations are anonymised to avoid accidental disclosure of individual identity.

Data will be minimally available only to the chief investigator (Dr Richard Phillips) and project lead (Professor Jamie Coleman), as well as authorised members of the University of Birmingham R&D team for the purpose of Sponsor oversight only.

**What will happen to the results of the research project?**

The results of the project will be shared with the University of Birmingham, with hopes to present at a conference or publish in a scientific journal.

**Who is organising and funding the research?**

This project will be conducted by a current clinical teaching fellow. No funding is required.

The project is organised by a current clinical teaching fellow (Dr Richard Phillips) at SWBH, affiliated with the University of Birmingham.

**Regulatory** **review of the study**

This study type does not require NHD research ethical but has received approval from the University of Birmingham

# **APPENDIX 3**

# **Participant consent form**

**PARTICIPATION IN THIS RESEARCH STUDY IS VOLUNTARY**

If you have satisfactorily read the participant information sheet and wish to volunteer then please complete this informed consent form. The form should be completed with an electronic signature and returned to the chief investigator, Dr Richard Phillips (richard.phillips13@nhs.net)

After completing the consent form, you will be invited by email to select a date for a focus group. No further action will be required from you once the focus group is completed.

Should you wish to withdraw consent prior to, during, or after the focus group this is possible and you should contact the chief investigator.

Please **initial** in box against each statement you agree with

| I confirm that I have read and understood the Participant Information Sheet |  |
| --- | --- |
| I have had the opportunity to ask questions and my questions have been answered to my satisfaction |  |
| I understand that all personal information will remain confidential and that all efforts will be made to ensure I cannot be identified (except as might be required by law) |  |
| I agree that data gathered in this study may be stored anonymously and securely, and may be used for future research |  |
| I consent voluntarily to be a participant in this study and understand that I can refuse to answer questions and that I can withdraw from the study at any time without having to provide a reason |  |
| I understand that the information I provide will be used for research publication and that the information will be anonymised |  |
| I agree that my anonymised responses can be quoted in research outputs |  |
| I give permission for the anonymised responses that I provide, to be deposited in a data archive so that it may be used for future research |  |
| I agree to take part in this study |  |

Please note, by answering ‘Yes’ to question 1 of the survey, you agree to all statements outlined above. Please retain a copy of this consent form.

Participant name:

Signature: ________________________________ Date ________________

Investigator name:

Signature: _______________________________ Date ________________

# **APPENDIX 4**

# **Semi-structured interview guide for medical student focus groups**

This semi-structured interview guide format is influenced by the works of Krueger and Casey (2009).

**Introduction:**

*Good day everyone. Thank you for joining this focus group to discuss your own insights and uses of commercial medical education resources.*

*In order that we are all understand the meaning of commercial medical education resources, I am defining them as “commercial-off-the-shelf learning platforms (herein referred to as MedED-COTS)”, which includes question banks that utilise spaced repetition and data analytics, user-generated flashcards, and interactive multi-media content*

**Opening questions:**

1. *A settling question to warm the group up*

- Question 1: “*Could everyone share their favourite placement of this year*
- *N.B. Do not directly ask the participants about their year group, in order to detract from highlighting status differences between participants.*

**Introductory questions**

1. *Opportunity to share general experiences with MedED-COTS.*

- Question 1: *based on the definition of MedED-COTS, what commercial resources have people used and how have you used them for learning?*
- Question 2: *using the pictures below, as a group can we identify all of the commercial resources (answers are: Geekymedics, CAPSULE, Osmosis, BiteMedicine, PassMedicine, Pastest, Quesmed, PulseNotes, Amboss)*


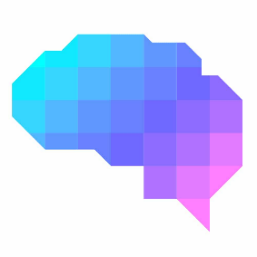

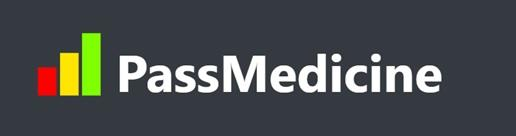

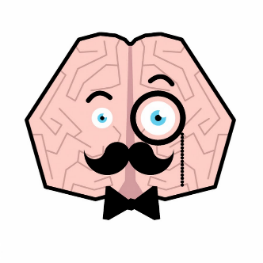


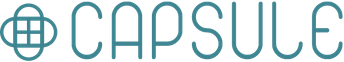

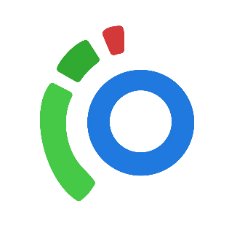

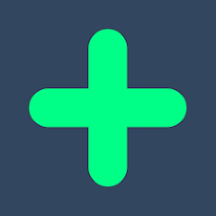

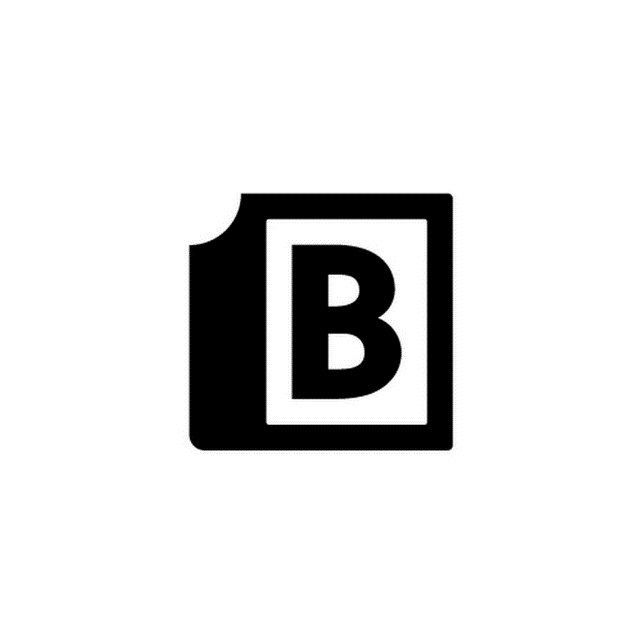


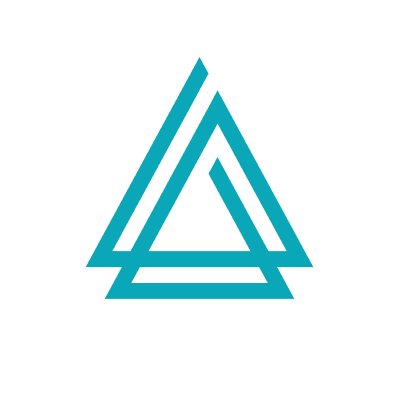

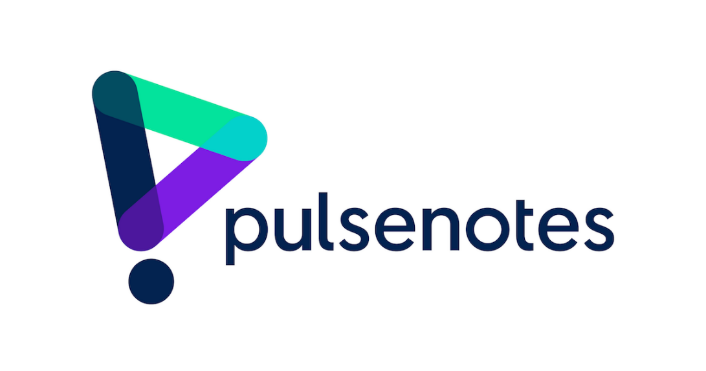


**Transition questions**

1. Link the previous introductory questions to the key questions with a linker.

- Question 1: *For what reasons are the revision resources we have highlighted considered effective by students?*

**Key questions**

- Question 1: *Why do you feel the need to use commercial medical education resources?*
- Prompt: *Your university provides you with lectures and structured teaching opportunities, is there a reason you seek resources outside of the institution?*
- Question 2: *Are there any limitations that you can see with using commercial medical education resources?*
- *Prompt: What disadvantages have you experienced when using MedED-COTS?*
- Question 3: *Your university has purchased institutional subscriptions to both Capsule and Osmosis. What have your experiences been with these medical education resources shared with you through the university?*
- Prompt: *Have you used Capsule and Osmosis. What were the advantages and disadvantages of it?*
- Question 4: *How does your view of resources differ if it has been individually purchased compared to institutionally available resources?*

**Ending questions**

1. *Summary question -*a summary of the discussion and asks participants to reflect on the adequacy of the summary
2. *Final question -* is there anything that you think that we should have talked about today but have not?

# **APPENDIX 5**

# **Semi-structured interview guide for clinical teacher focus groups**

This semi-structured interview guide format is influenced by the works of Krueger and Casey (2009), as well as adult learning theory from Knowles (1984).

**Introduction:**

*Good day everyone. Thank you for joining this focus group to discuss your own insights and uses of commercial medical education resources.*

*In order that we are all understand the meaning of commercial medical education resources, I am defining them as “commercial-off-the-shelf learning platforms (herein referred to as MedED-COTS)”, which includes question banks that utilise spaced repetition and data analytics, user-generated flashcards, and interactive multi-media content*

**Opening questions:**

1. *A settling question to warm the group up*

- Question: “*Could everyone share their favourite teaching modality.”*

**Introductory questions**

1. *Opportunity to share general experiences with MedED-COTS.*

- Question 1: *based on the definition of MedED-COTS, what commercial resources have people used and how have you used them for teaching?*
- Question 2: *using the pictures below, as a group can we identify all of the commercial resources (answers are: Geekymedics, CAPSULE, Osmosis, BiteMedicine, PassMedicine, Pastest, Quesmed, PulseNotes, Amboss)*


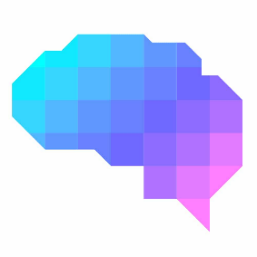

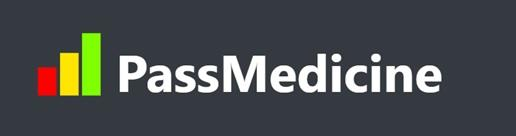

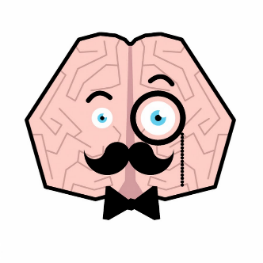


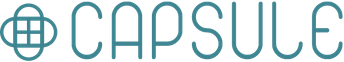

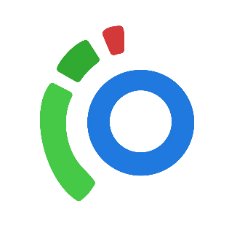

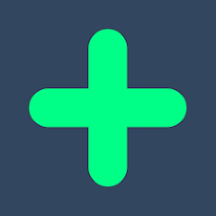

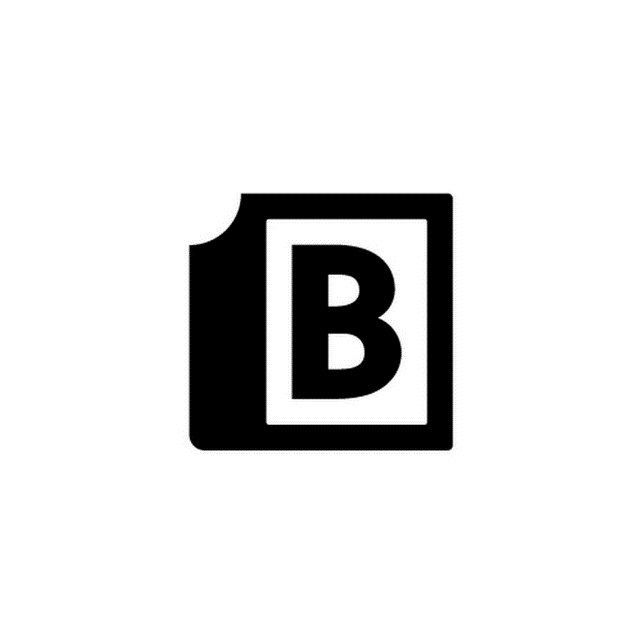


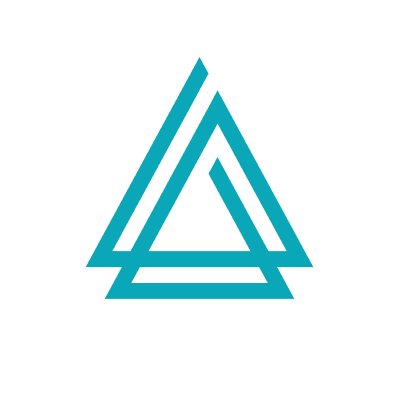

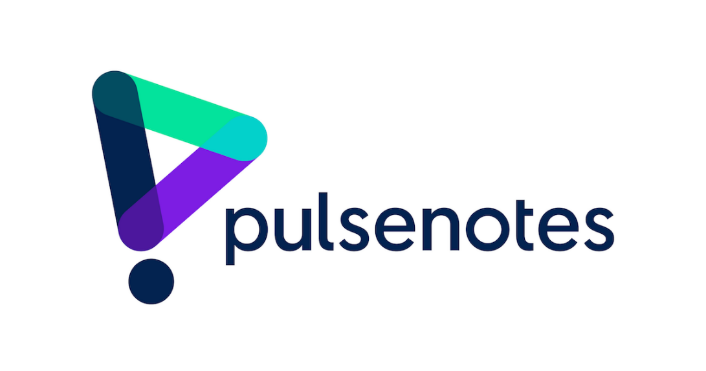


**Transition questions**

1. Link the previous introductory questions to the key questions with a linker.

- Question 1: *For what reasons do you think that the revision resources we have highlighted are considered effective by students?*

**Key questions**

- Question 1: *What have been your experiences of using MedED-COTS during your teaching?*
- Prompt: *Have you relied on commercial resources for planning, delivery or post-session reviews?*
- Question 2: Have you utilised Capsule and Osmosis during your teaching? What have your experiences been?
- Prompt: Was Capsule and Osmosis made available to you and what were the barriers to its use?
- Question 3: *What have been your experiences of students referencing MedED-COTS during your teaching?*
- Prompt: *How does it feel if a student challenges your own knowledge with content they gained from MedED-COTS?*

**Ending questions**

1. *Summary question -*a summary of the discussion and asks participants to reflect on the adequacy of the summary
2. *Final question -* is there anything that you think that we should have talked about today but have not?

# **APPENDIX 6**

# **An excerpt of the transcript with coding in N. Vivo 12**


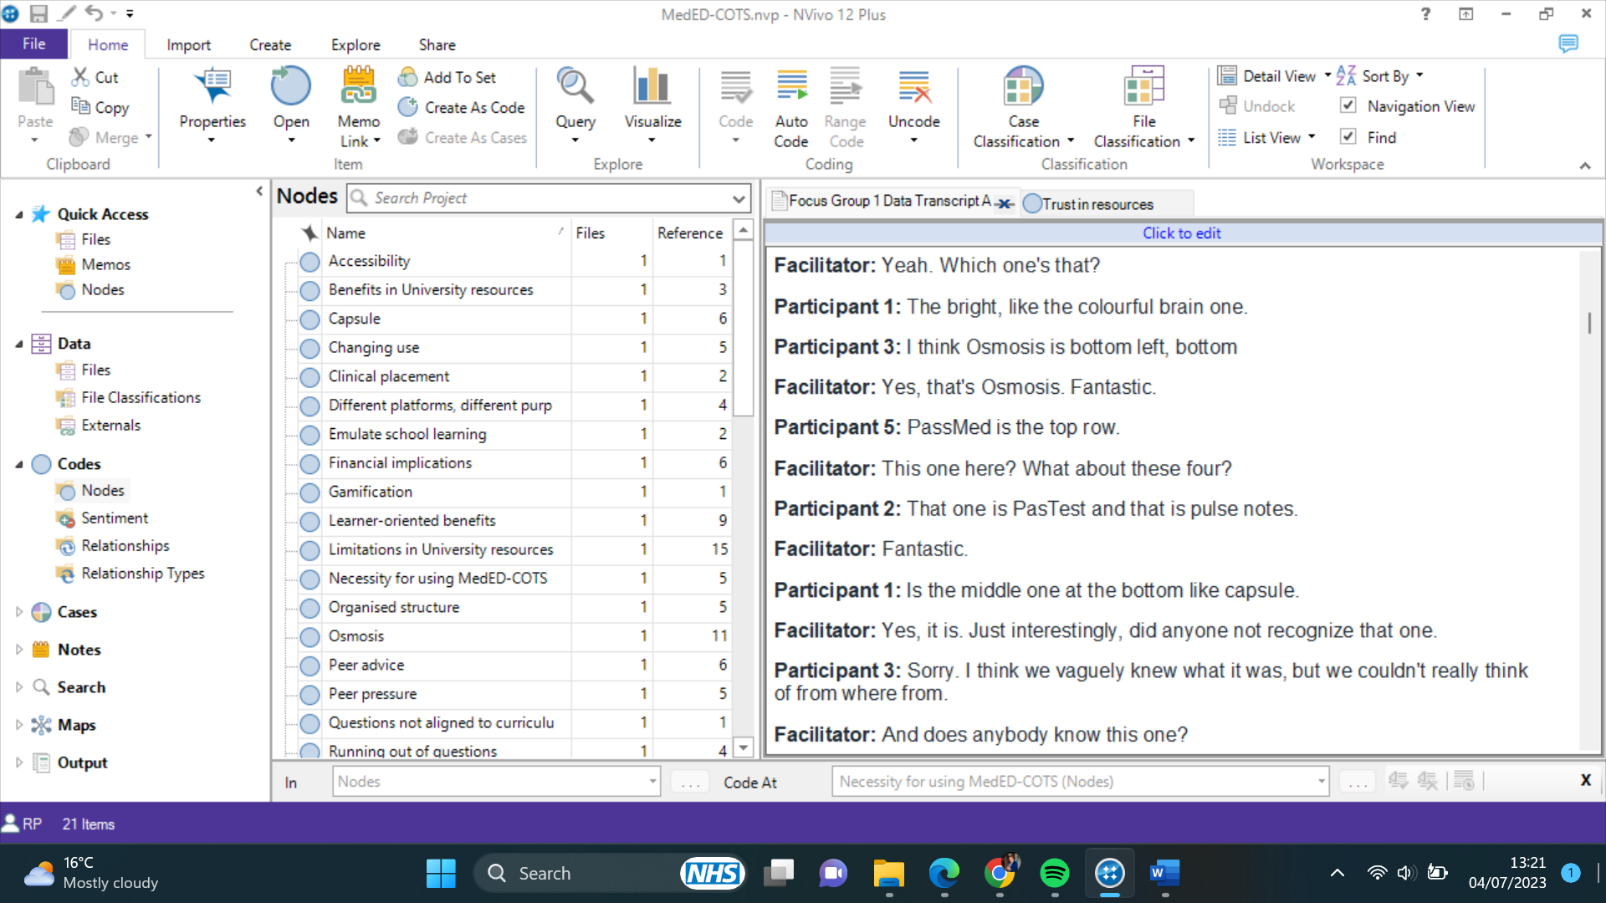


# **APPENDIX 7**

# **SRQR Reporting checklist for qualitative study - 21-item checklist**

| **Section** | **Reporting item** | **Description** | **Page number** |
| --- | --- | --- | --- |
| Title | Title | Concise description of the nature and topic of the study, identifying it as qualitative or indicating the approach (e.g. ethnography, grounded theory) or data collection methods (e.g. interview, focus group). | 1 |
| Abstract | Abstract | Summary of key elements of the study (background, purpose, methods, results, conclusions) using the target journal’s abstract format. | 2 |
| Introduction | Problem formulation | |  | | --- |  | Description and significance of the problem/phenomenon studied; review of relevant theory and empirical work; problem statement. | | --- | | 6 |
|  | Purpose or research question | Purpose of the study and specific objectives or research questions. | 7-9 |
| Methods | Qualitative approach and paradigm | Qualitative approach (e.g. case study, phenomenology), guiding theory if appropriate, research paradigm (e.g. interpretivist). Rationale for these choices. | 10, 15, 16 |
|  | Researcher characteristics and reflexivity | Researchers’ characteristics that may influence the research (attributes, qualifications/experience, relationship with participants, assumptions). How these interacted with study design, data collection, and interpretation. | 15, 16 |
|  | Context | Setting/site and salient contextual factors; rationale for selection. | 10 |
|  | Sampling strategy | How and why participants/documents/events were selected; criteria for when no further sampling was necessary (e.g. saturation); rationale. | 12 |
|  | Ethical issues | Documentation of ethical approval and consent procedures; confidentiality/data security issues. | 12, appendix 1 |
|  | Data collection instruments and technologies | Types of data collected; details of collection procedures (start/stop dates, iteration, triangulation, modifications); rationale. | 13 |
|  | Data processing | Instruments used (e.g. interview guide, focus group prompts) and devices (e.g. audio recorders); note if/how these changed during the study. | 13 |
|  | Data analysis | Number and relevant characteristics of participants/documents/events; level of participation. | 14 |
|  | Techniques to enhance trustworthiness | Approaches used to enhance credibility/trustworthiness (e.g. member checking, audit trail, triangulation); rationale. | 14, 15 |
| Results / findings | Syntheses and interpretation | Main findings (interpretations, inferences, themes); may include theory/model development or integration with prior work. | 17-27 |
|  | Links to empirical data | Evidence (e.g. quotes, field notes, text excerpts) provided to substantiate analytic findings. | 17-27 |
| Discussion | Integration with prior work, implications, transferability, contributions | How findings relate to earlier scholarship; scope of application/generalizability; unique contributions to the field. | 28-32 |
|  | Limitations | Trustworthiness and limitations of findings. | 31-32 |
| Other | Conflicts of interest | Potential sources of influence or bias and how these were managed. | 34 |
|  | Funding | Sources of funding/support and the role of funders in study design, data collection, interpretation and reporting. | 34 |

# **APPENDIX 8**

# **Consolidated criteria for reporting qualitative studies (COREQ): 32-item checklist**

The COREQ checklist has been used to help guide the structure of our protocol. Where possible, each item within the checklist has been acknowledged as complete (or otherwise) in the far-right column. This checklist will be used again upon completion of the study.

| **Number** | **Item** | **Guide question** | **Answer for this protocol** |
| --- | --- | --- | --- |
| **Domain 1: research team and reflectivity** | | | |
| Personal characteristics | | | |
|  | Interviewer | Which author(s) conducted the interview/focus group? | R.P |
|  | Credentials | What were the researcher’s credentials? | BA (cantab),  MB BChir, PGCertMedEd, FHEA |
|  | Occupation | What was their occupation at the time of the study? | Clinical teaching fellow |
|  | Gender | Was the researcher male or female? | Male |
|  | Experience and training | What experience or training did the researcher have | Coursera training course |
| Relationship with participants | | | |
|  | Relationship established | Was a relationship established prior to study commencement? | Yes. Teacher to students. Peer to doctors. |
|  | Participant knowledge of the interviewer | What did the participants know about the researcher? e*.g. personal goals, reasons for doing the research* | Personal goals, reasons for conducting research |
|  | Interviewer characteristics | What characteristics were reported about the interviewer/facilitator? e.g. *Bias, assumptions, reasons and interests in the research topic* | Self-reported to the participants reasons for conducting the research, as well as co-ownership of a MedED-COTS platform. This underlies the main interests in the topic |
| **Domain 2: study design** | | | |
| Theoretical framework | | | |
|  | Methodological orientation and Theory | What methodological orientation was stated to underpin the study? *e.g. grounded theory, discourse analysis, ethnography, phenomenology, content analysis* | Interpretivist paradigm (realist and social constructivist) |
| Participant selection | | | |
|  | Sampling | How were participants selected? *e.g. purposive, convenience, consecutive, snowball* | Purposive, convenience and snowballing |
|  | Method of approach | How were participants approached? e*.g. face-to-face, telephone, mail, email* | Email via a gatekeeper |
|  | Sample size | How many participants were in the study? | 291 were emailed. 5 students and 6 clinical teaching fellows were recruited. |
|  | Non-participation | How many people refused to participate or dropped out? Reasons? | No drop outs upon recruitment. 11 recruited from a sample of 291. |
| Setting | | | |
|  | Setting of data collection | Where was the data collected? e*.g. home, clinic, workplace* | Workplace (using virtual software to connect with participants) |
|  | Presence of non-participants | Was anyone else present besides the participants and researchers? | No |
|  | Description of sample | What are the important characteristics of the sample? *e.g. demographic data, date* | Year group and experience with MedED-COTS. Included in tables 2 and 3. |
| Data collection | | | |
|  | Interview guide | Were questions, prompts, guides provided by the authors? Was it pilot tested? | Semi-structured interview guides will be utilised. |
|  | Repeat interviews | Were repeat interviews carried out? If yes, how many? | No |
|  | Audio/visual recording | Did the research use audio or visual recording to collect the data? | Yes. Zoom, as well as an AI plugin called Twine. |
|  | Field notes | Were field notes made during and/or after the interview or focus group? | Minimal |
|  | Duration | What was the duration of the interviews or focus group? | Maximum of 60 minutes for both |
|  | Data saturation | Was data saturation discussed? | Yes. 2 groups were conducted, with research suggesting 2-3 needed for data saturation. |
|  | Transcripts returned | Were transcripts returned to participants for comment and/or correction? | No. |
| **Domain 3: analysis and findings** | | | |
| Data analysis | | | |
|  | Number of data coders | How many data coders coded the data? | 1 |
|  | Description of the coding tree | Did authors provide a description of the coding tree? | Yes. In appendix. |
|  | Derivation of themes | Were themes identified in advance or derived from the data? | Themes were derived deductively from prior thematic work by Finn *et al* (2022). |
|  | Software | What software, if applicable, was used to manage the data? | N.Vivo 12 |
| 28. | Participant checking | Did participants provide feedback on the findings? | No. |
| Reporting | | | |
| 29. | Quotations presented | Were participant quotations presented to illustrate the themes / findings? Was each quotation identified? e*.g. participant number* | Yes. Using participant number to anonymise the participants. |
| 30. | Data and findings consistent | Was there consistency between the data presented and the findings? | Yes. |
| 31. | Clarity of major themes | Were major themes clearly presented in the findings? | Yes |
| 32. | Clarity of minor themes | Is there a description of diverse cases or discussion of minor themes? | Yes |
